# Supplementary material for: Sterically crowded azulene-based dication salts as novel guests: synthesis and complexation studies with crown ethers and calixarenes in solution and in the gas phase
Source: Royal Society of Chemistry journal article supplement (doi:10.1039/b604924a), 2006-01-01
Supplement: b604924a.pdf [file b604924a.pdf]

Supporting information

**Sterically Crowded Azulene-Based Dication Salts as Novel Guests; Synthesis  
and Complexation Studies with Crown Ethers and Calixarenes in Solution and  
in the Gas Phase**

Cédric Brulé, Stephanie Holmer,<sup>+</sup> Seth Krechanin<sup>++</sup> and Kenneth K. Laali\*

|                                                                                                                                                                                            | Page |
|--------------------------------------------------------------------------------------------------------------------------------------------------------------------------------------------|------|
| <b>Figure S1.</b> MALDI-TOF-MS of oligomeric green powder via attempted dication salt synthesis with parent azulene.....                                                                   | S2   |
| <b>Figure S2.</b> Electrospray MS/MS spectrum of <b>1</b> /DB30C10. 1:1 complex.....                                                                                                       | S3   |
| <b>Figure S3.</b> ES-MS spectrum of <b>1</b> / <i>p</i> -methoxy- <i>t</i> Bu-calix[8]arene showing [GH] <sup>2+</sup> and [GH <sub>2</sub> ] <sup>2+</sup> cation/molecule clusters. .... | S4   |
| <b>Figure S4.</b> ES-MS detection of the 1:2 complex between <b>2</b> and DB30C10.....                                                                                                     | S5   |
| <b>Figure S5</b> Enlarged version of Fig. 7.....                                                                                                                                           | S6   |
| <b>Table S1:</b> Binding constant and thermodynamic parameters .....                                                                                                                       | S7   |

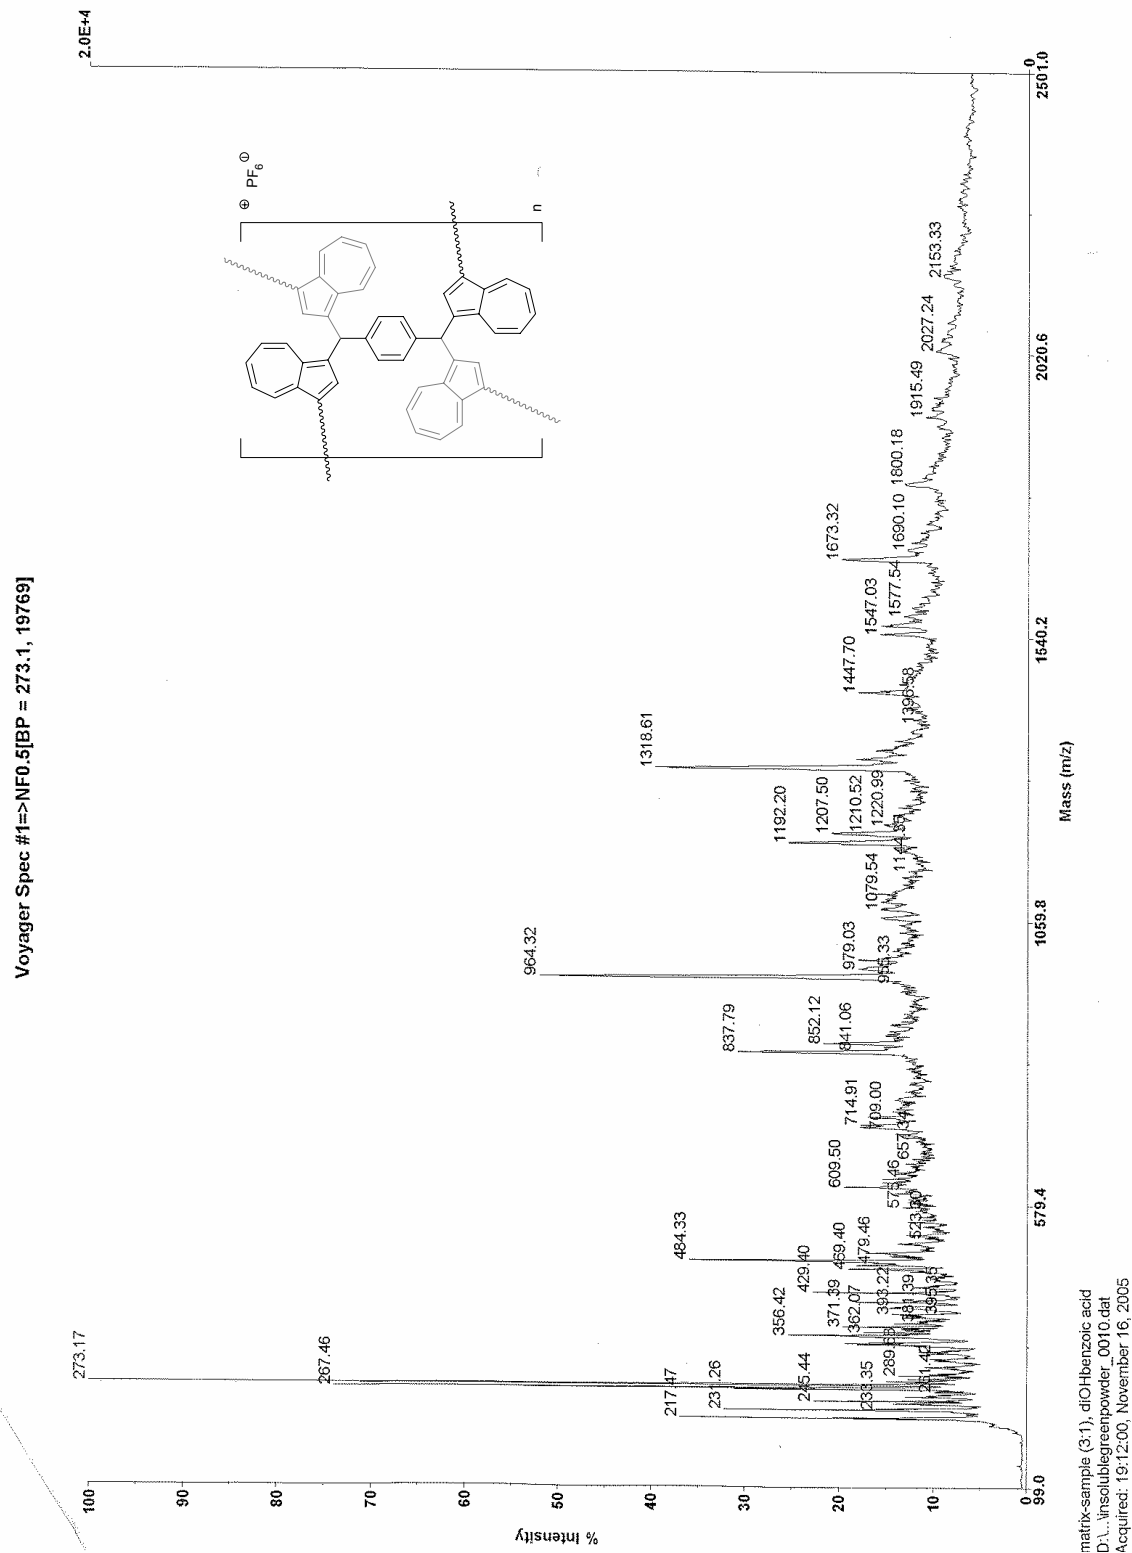

Fig. S1. MALDI-TOF-MS of oligomeric green powder via attempted dication salt synthesis with parent azulene

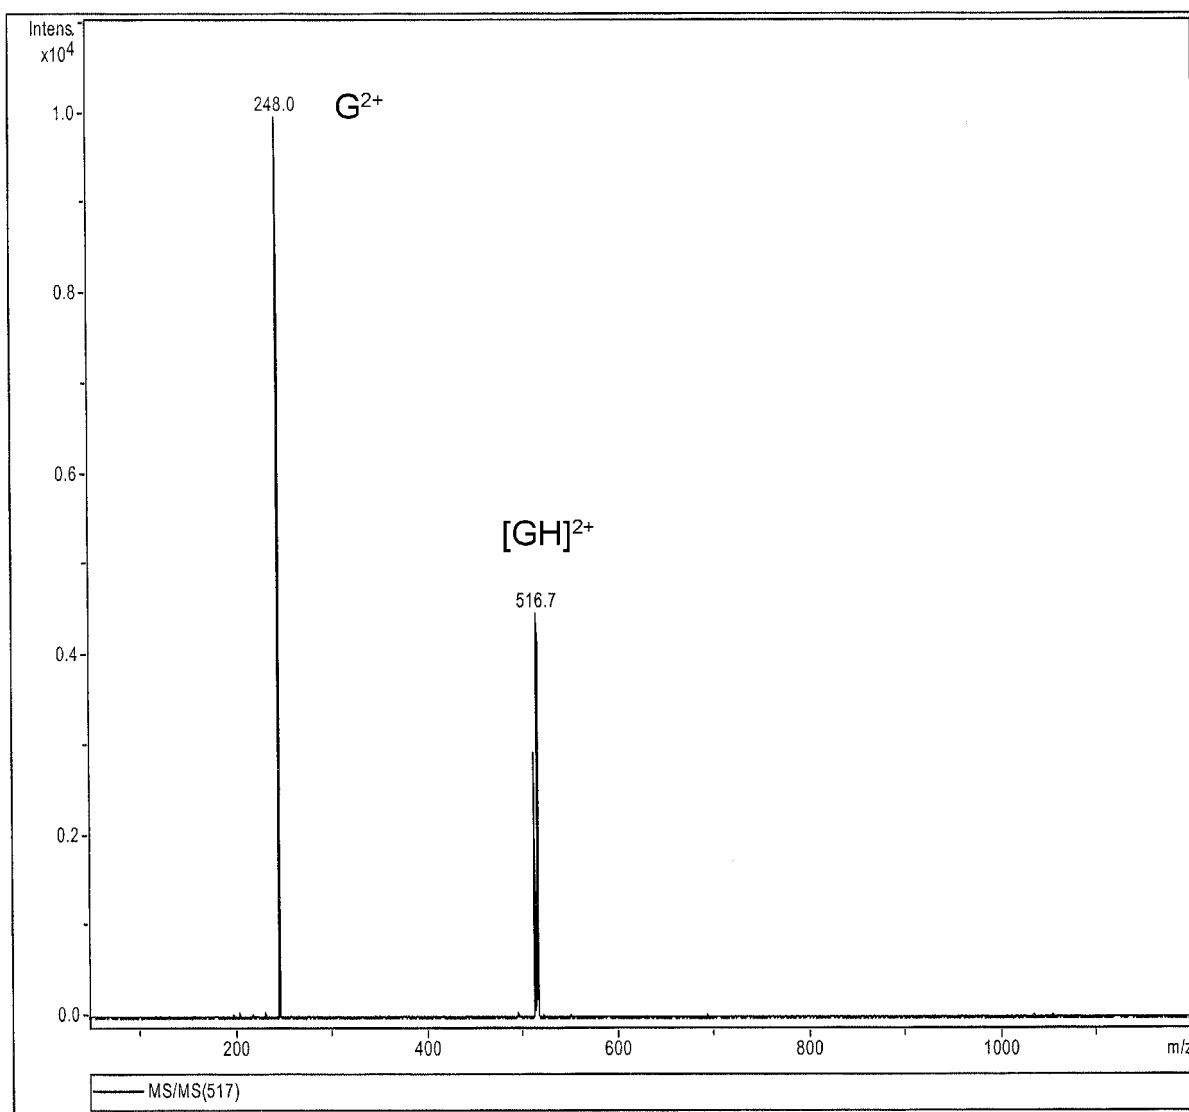

**Fig. S2.** Electrospray MS/MS spectrum of 1/DB30C10. 1:1 complex .

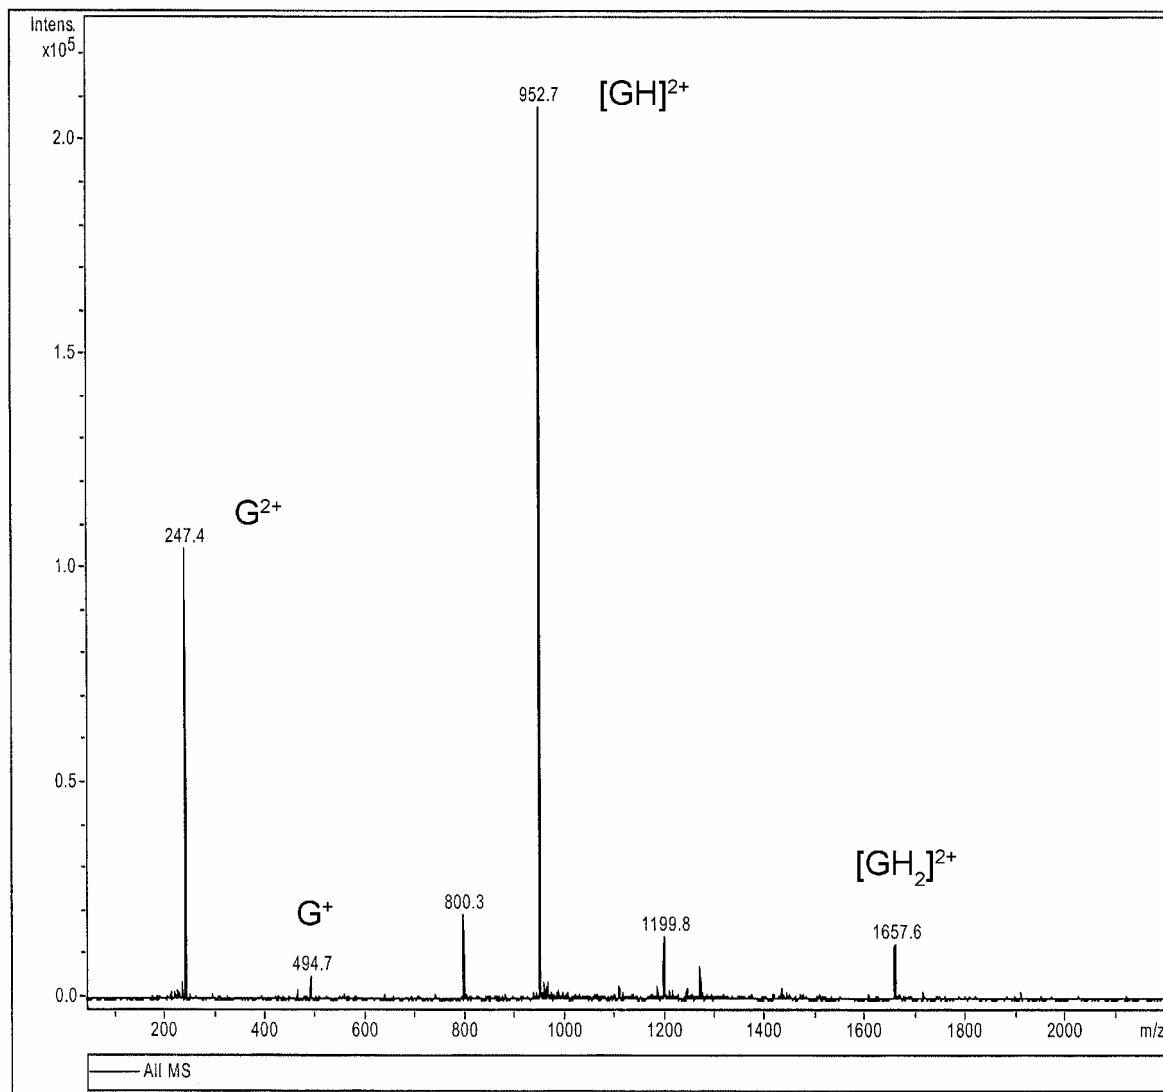

**Fig. S3.** ES-MS spectrum of 1/*p*-*t*Bu-methoxycalix[8]arene showing [GH]<sup>2+</sup> and [GH<sub>2</sub>]<sup>2+</sup> cation/molecule clusters

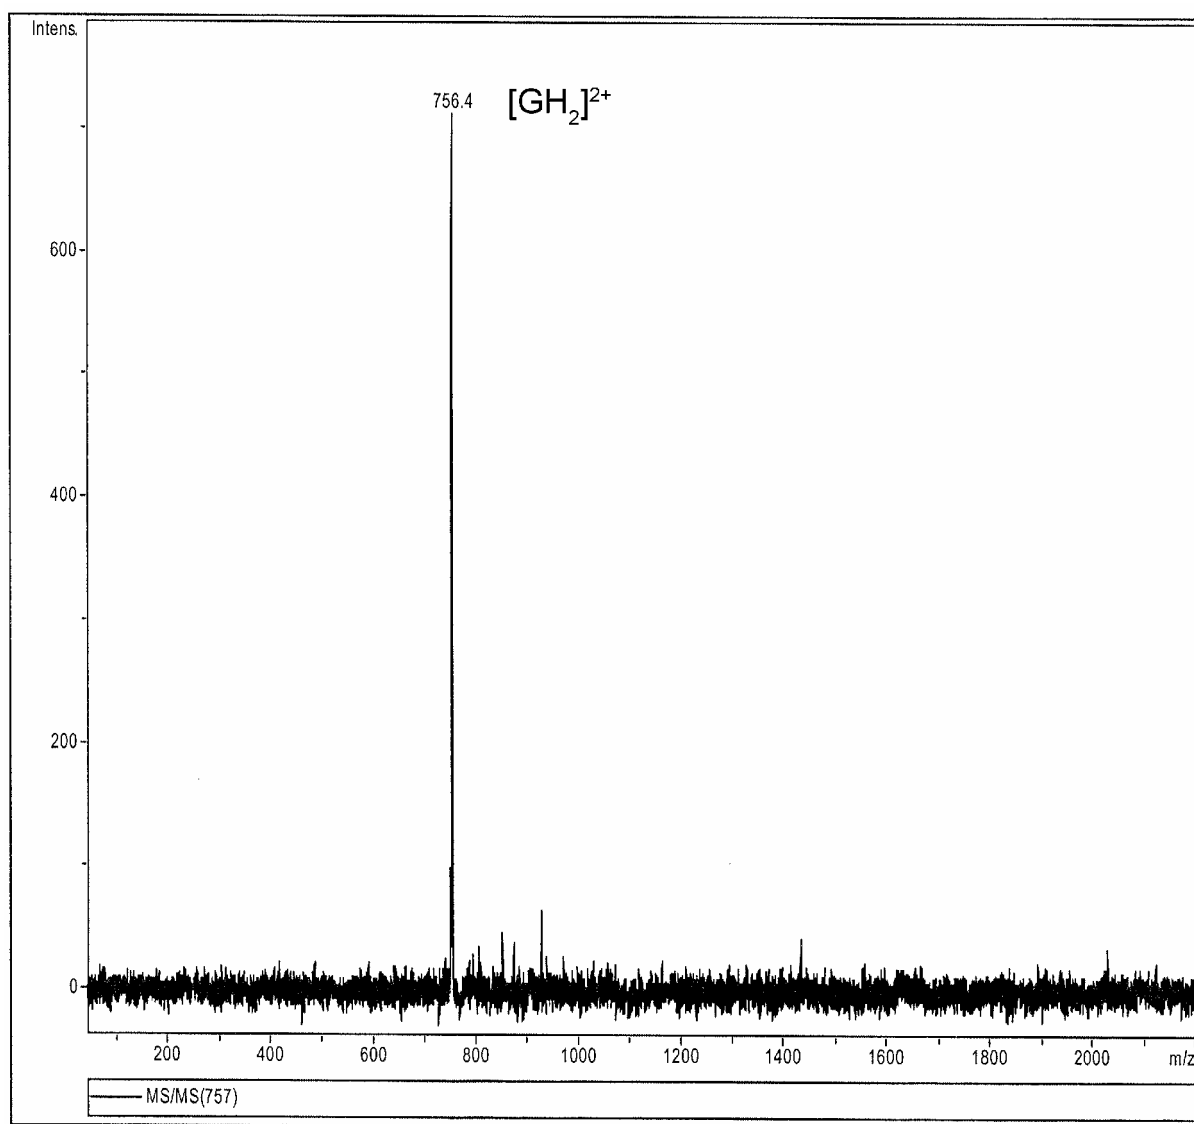

**Fig. S4.** ES-MS detection of the 1:2 complex between **2** and DB30C10

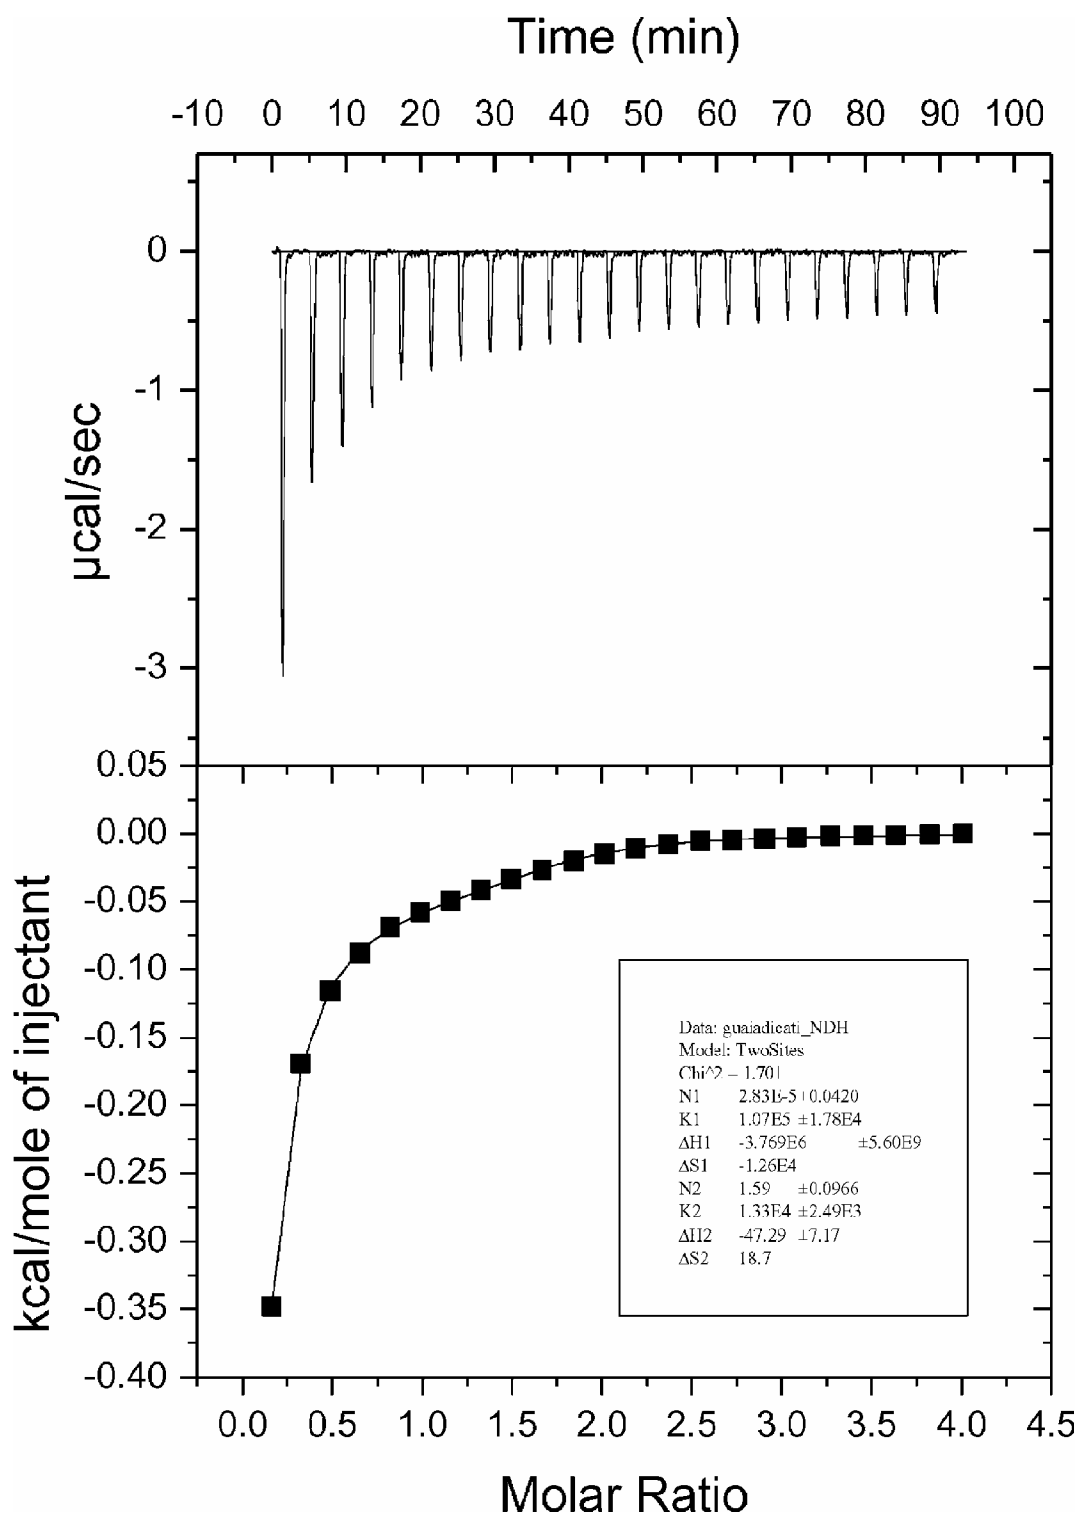

Fig. S5: Enlarged version of Fig. 7

**Table S1:** Binding constant and thermodynamic parameters

| Number of complexation sites (n) | $\log K$      | $\Delta H$<br>(kJ.mol <sup>-1</sup> ) | $T\Delta S$<br>(kJ.mol <sup>-1</sup> ) | $\Delta G$<br>(kJ.mol <sup>-1</sup> ) |
|----------------------------------|---------------|---------------------------------------|----------------------------------------|---------------------------------------|
| $n_1 = 0.00 \pm 0.04$            | $5.0 \pm 0.4$ | nt                                    | nt.                                    | nt                                    |
| $n_2 = 1.6 \pm 0.1$              | $4.1 \pm 0.3$ | $-0.20 \pm 0.03$                      | 23.29                                  | -23.49                                |

nt: not reported due to uncertainty in accuracy
